# Supplementary material for: Phytate and Butyrate Differently Influence the Proliferation, Apoptosis and Survival Pathways in Human Cancer and Healthy Colonocytes
Source: MDPI journal article supplement (doi:10.3390/nu13061887), 2021-05-31
Supplement: s1 [file s1]

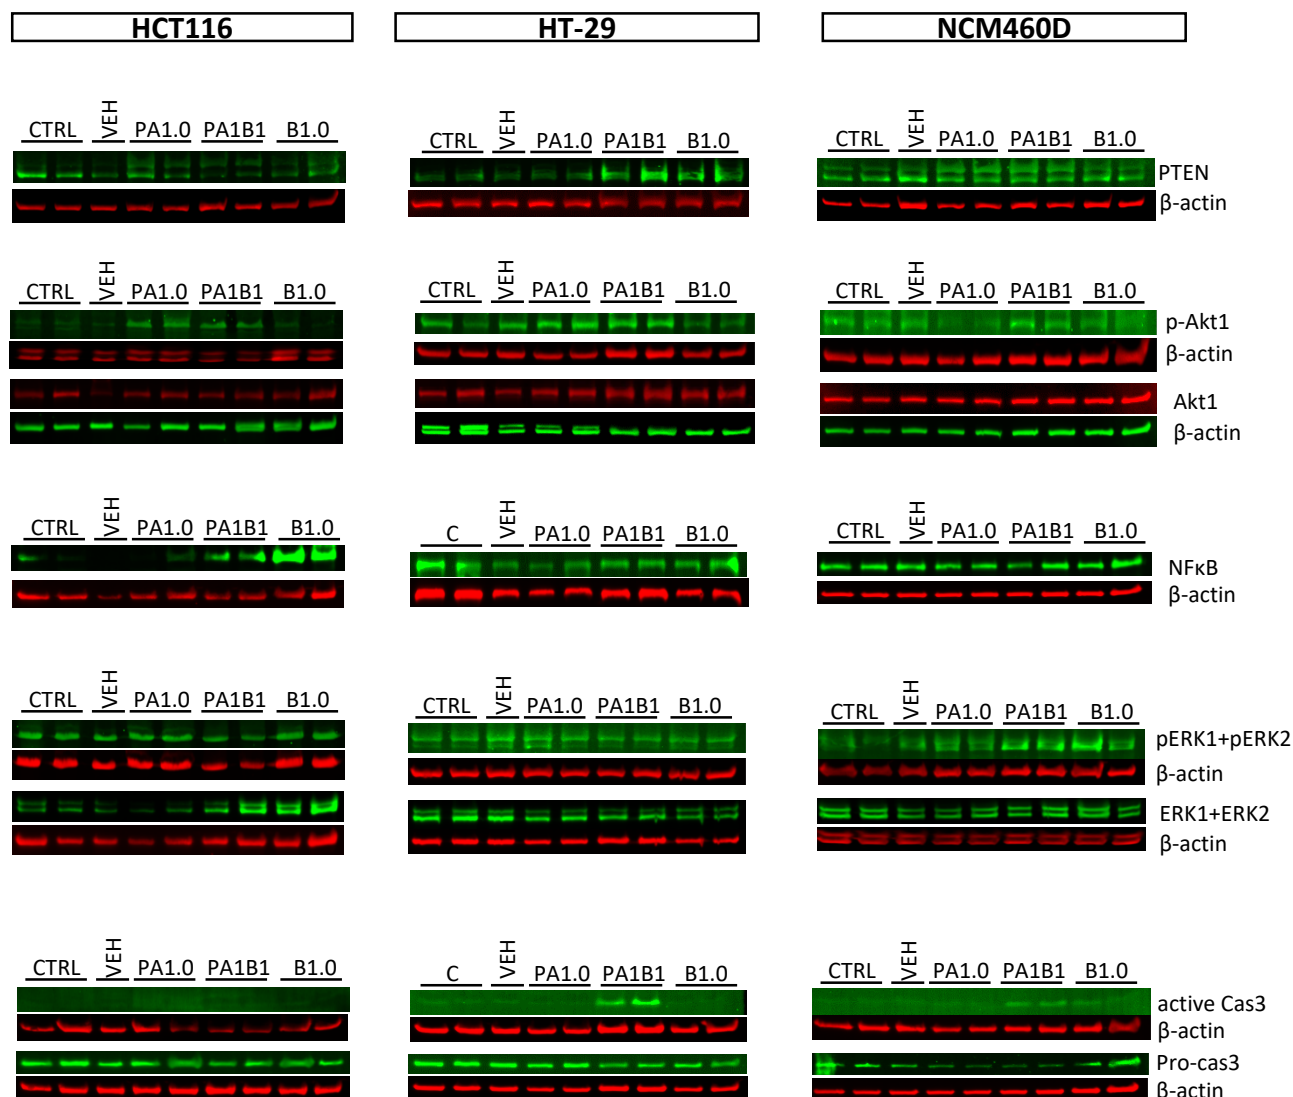

Figure S4. Exemplary immunoblots showing the impact of 24h-incubation of cancer (HCT116 and HT-29) and healthy (NCM460D) colonocytes in the presence of 1 mM of phytate (PA1.0), 1 mM of butyrate (B1.0) or their combination (PA1B1) on levels of PTEN, p-Akt, Akt, NFκB, pERK1/2, ERK1/2, active caspase 3 and pro-caspase 3. CTRL – control cells incubated without supplements, VEH – cells incubated in the presence of PBS.
