# Supplementary material for: Phytate and Butyrate Differently Influence the Proliferation, Apoptosis and Survival Pathways in Human Cancer and Healthy Colonocytes
Source: MDPI journal article supplement (doi:10.3390/nu13061887), 2021-05-31
Supplement: s1 [file s1]

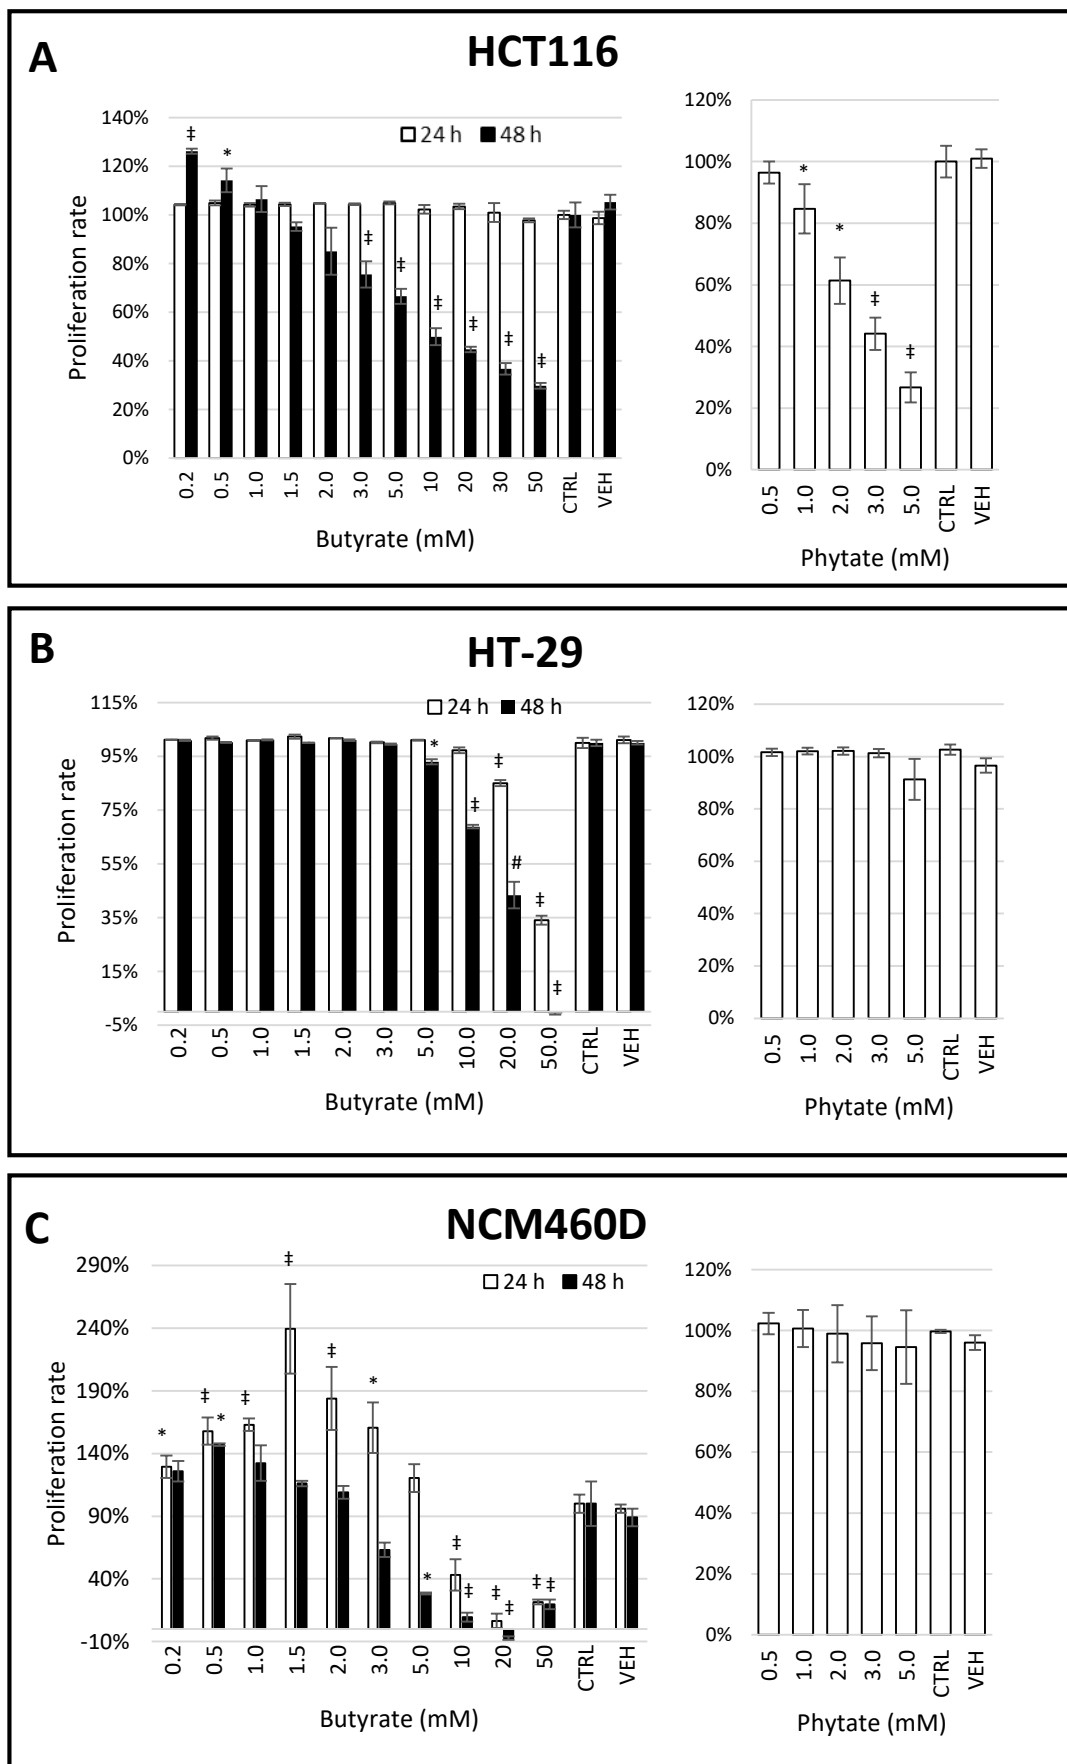

Figure S1. Proliferation rate (%) of A) HCT116, B) HT-29 and C) NCM460D cells in the presence of butyrate or phytate applied separately. Control cells were incubated without phytate or butyrate (CTRL) or with PBS as a vehicle (VEH). Incubations were carried out at 37°C for 24 h (with PA and BUT) or 48 hours (only with BUT). Statistically significant changes in proliferation rate are marked with \* ( $P \leq 0.05$ ), # ( $P \leq 0.01$ ) and † ( $P \leq 0.001$ ) and were calculated in reference to CTRL.
