# Supplementary material for: Phytate and Butyrate Differently Influence the Proliferation, Apoptosis and Survival Pathways in Human Cancer and Healthy Colonocytes
Source: MDPI journal article supplement (doi:10.3390/nu13061887), 2021-05-31
Supplement: s1 [file s1]

## HCT116

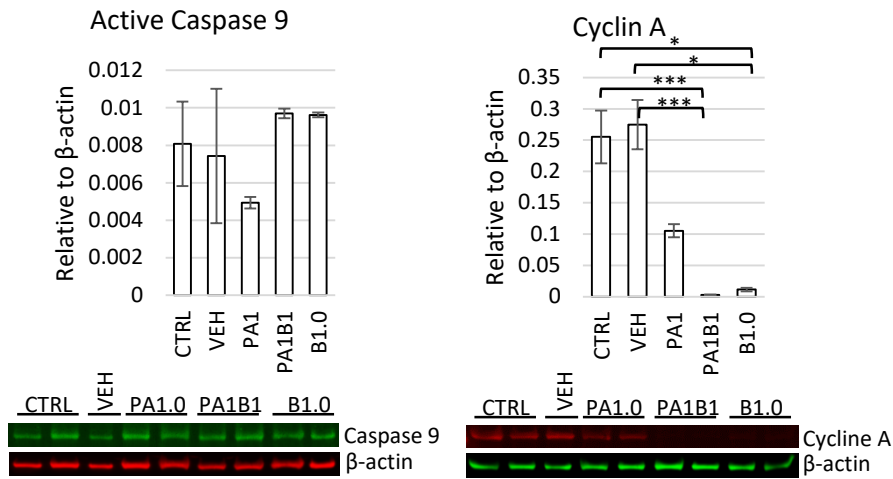

## HT-29

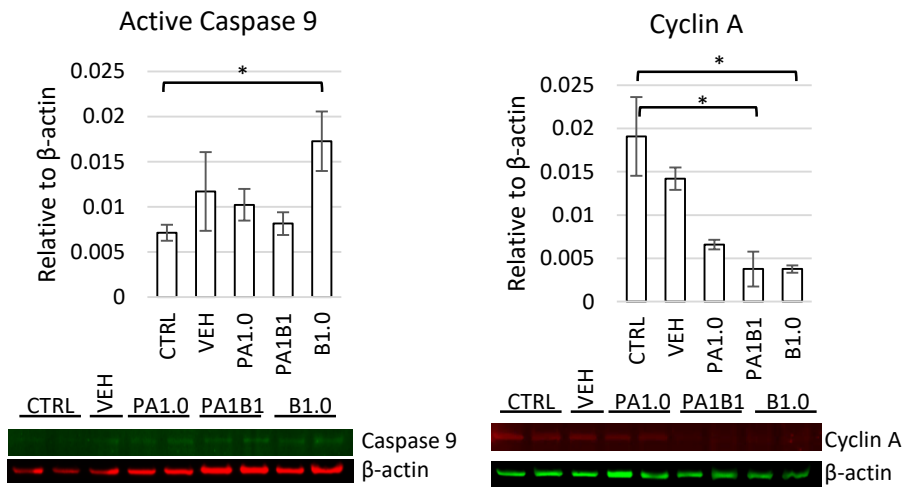

## NCM460D

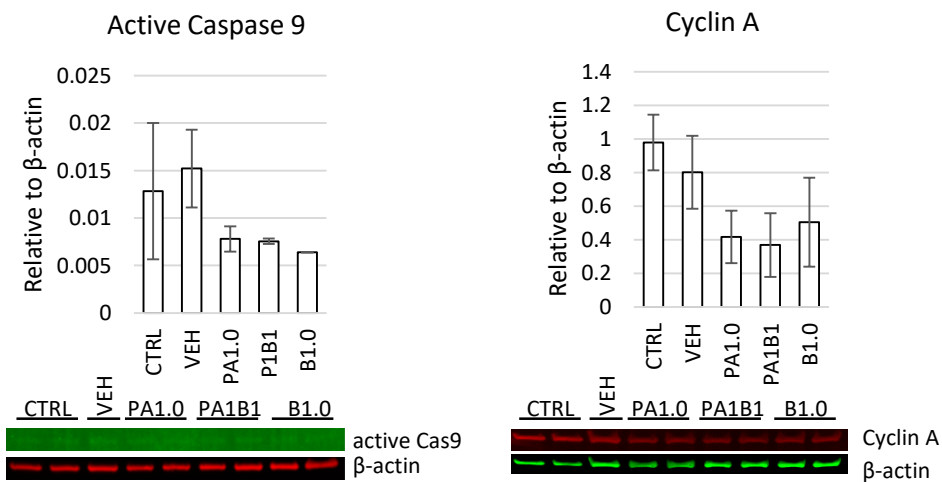

Figure S3. Impact of 24h-incubation of cancer (HCT116 and HT-29) and healthy (NCM460D) colonocytes in the presence of 1 mM of phytate (PA1.0), 1 mM of butyrate (B1.0) or their combination (PA1B1) on levels of active Caspase 9 and cyclin A. CTRL – control cells incubated without supplements, VEH – cells incubated in the presence of PBS.
