# Supplementary material for: Phytate and Butyrate Differently Influence the Proliferation, Apoptosis and Survival Pathways in Human Cancer and Healthy Colonocytes
Source: MDPI journal article supplement (doi:10.3390/nu13061887), 2021-05-31
Supplement: s1 [file s1]

## Supplementary Information

Table S1. List of the authentic standards used for HPLC-MS analysis of the phytate preparation

|     | Name of a standard                                                      | Producer, catalog number             | Inositol phosphate |
|-----|-------------------------------------------------------------------------|--------------------------------------|--------------------|
| 1.  | D- <i>myo</i> -Inositol 1,2,3,5,6-pentakisphosphate (decasodium salt)   | Sigma, 76667-1MG                     | 1,2,3,5,6-IP5      |
| 2.  | D- <i>myo</i> -Inositol-1,2,3,6-tetrakisphosphate (tetrapotassium salt) | Cayman Chemical, 10008450            | 1,2,3,6-IP4        |
| 3.  | D- <i>myo</i> -Inositol-1,2,5,6-tetrakisphosphate (ammonium salt)       | Santa Cruz Biotechnology, sc-214815  | 1,2,5,6-IP4        |
| 4.  | D- <i>myo</i> -Inositol-1,2,6-triphosphate (sodium salt)                | Santa Cruz Biotechnology, sc-223918  | 1,2,6-IP3          |
| 5.  | D- <i>myo</i> -Inositol 1,4,5-trisphosphate (hexapotassium salt)        | ENZO Life Sciences, ALX-307-009-M001 | 1,4,5-IP3          |
| 6.  | D- <i>myo</i> -Inositol-1,5,6-triphosphate (sodium salt)                | Santa Cruz Biotechnology, sc-205286  | 1,5,6-IP3          |
| 7.  | D- <i>myo</i> -Inositol-1,2-diphosphate (sodium salt)                   | Santa Cruz Biotechnology, sc-223910  | 1,2-IP2            |
| 8.  | D- <i>myo</i> -Inositol 1,4-bisphosphate (potassium salt)               | Santa Cruz Biotechnology, sc-214818  | 1,4-IP2            |
| 9.  | D- <i>myo</i> -Inositol-4,5-diphosphate (sodium salt)                   | Santa Cruz Biotechnology, sc-221514  | 4,5-IP2            |
| 10. | D- <i>myo</i> -Inositol-1-phosphate (sodium salt)                       | Santa Cruz Biotechnology, sc-223909  | 1-IP1              |
| 11. | <i>myo</i> -Inositol                                                    | Santa Cruz Biotechnology, 202714     | IP                 |
