# Supplementary material for: Phytate and Butyrate Differently Influence the Proliferation, Apoptosis and Survival Pathways in Human Cancer and Healthy Colonocytes
Source: MDPI journal article supplement (doi:10.3390/nu13061887), 2021-05-31
Supplement: s1 [file s1]

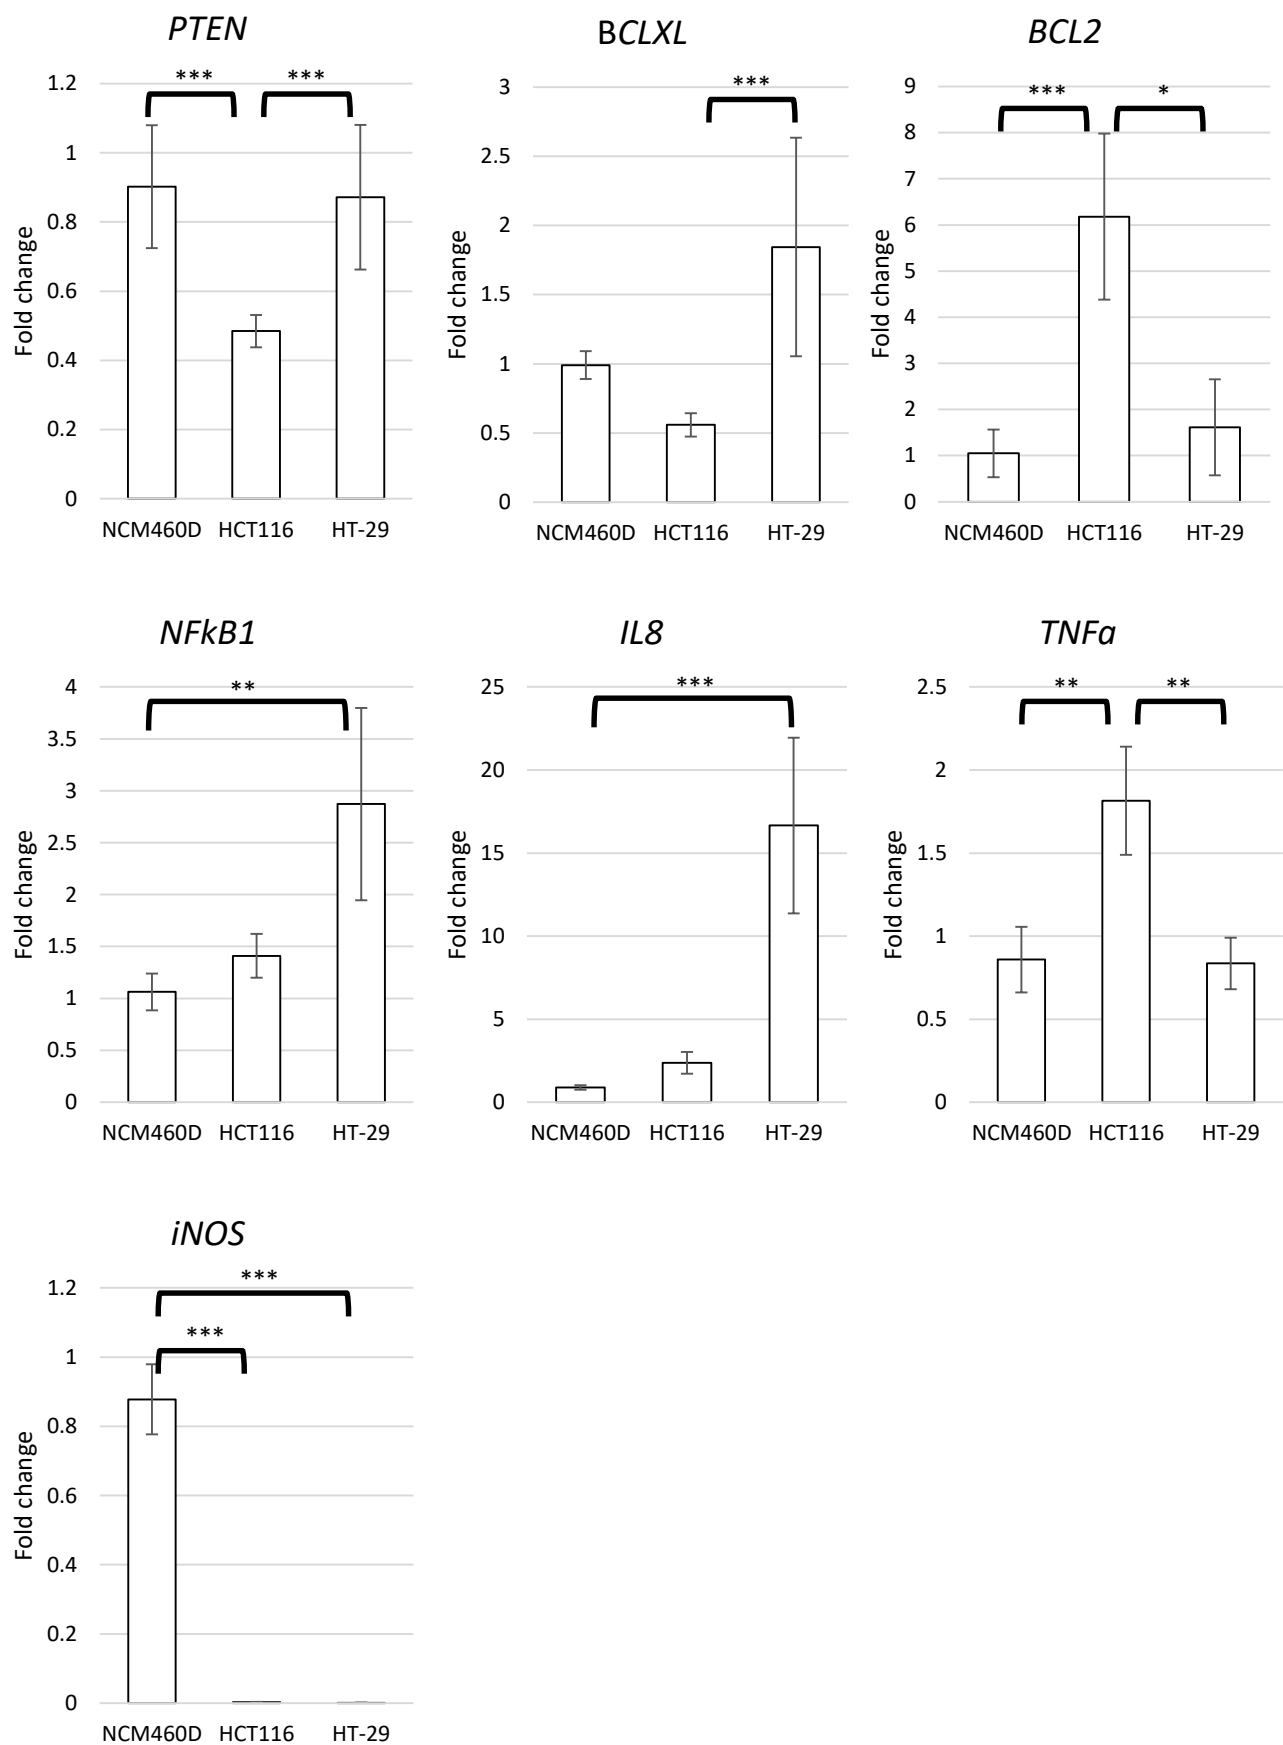

Figure S2. Comparison of basal gene expression level in investigated cell lines. Gene expression in HCT116 and HT-29 was related to *ACTB* in NCM460D.
